# Supplementary material
Source: publisher figshare collection journal article supplement (https://rs.figshare.com/ndownloader/files/17090153)
Supplement: Supplementary file 1 [file 17090153]

## Sheet: larval density data.csv
start date	depth (m)	time	tide	larvae
2012-11-20	0	N	E	0		time: N = night; C = crepuscular; D = day
2012-11-20	0	C	F	0		tide: E = ebb tide; F = flood tide
2012-11-20	0	D	F	32		larvae = counts
2012-11-20	0	D	E	0
2012-12-17	0	N	E	0
2012-12-17	0	N	E	0
2012-12-17	0	N	F	0
2012-12-17	0	C	F	0
2012-12-17	0	D	E	0
2012-12-17	0	D	E	0
2012-12-17	0	D	F	0
2013-10-27	0	C	F	0
2013-10-27	0	N	E	3
2013-10-27	0	N	F	0
2013-11-05	0	D	F	18
2013-11-05	0	D	E	5
2013-11-05	0	C	E	18
2013-11-05	0	N	E	0
2013-11-05	0	N	F	5
2013-11-05	0	C	E	51
2013-12-16	0	C	E	0
2013-12-16	0	N	F	0
2013-12-16	0	N	E	0
2013-12-16	0	C	E	0
2013-12-16	0	D	E	0
2013-12-16	0	D	F	0
2012-11-20	3	N	E	0
2012-11-20	3	N	F	0
2012-11-20	3	D	F	40
2012-11-20	3	D	E	48
2012-12-17	3	C	E	8
2012-12-17	3	N	E	3
2012-12-17	3	N	F	0
2012-12-17	3	C	F	0
2012-12-17	3	D	E	0
2012-12-17	3	D	E	0
2012-12-17	3	D	F	0
2013-10-27	3	C	F	8
2013-10-27	3	N	E	0
2013-10-27	3	N	F	16
2013-11-05	3	D	F	17
2013-11-05	3	D	E	14
2013-11-05	3	C	E	8
2013-11-05	3	N	E	0
2013-11-05	3	N	F	14
2013-11-05	3	C	E	0
2013-12-16	3	C	E	0
2013-12-16	3	N	F	0
2013-12-16	3	N	E	0
2013-12-16	3	C	E	0
2013-12-16	3	D	E	0
2013-12-16	3	D	F	3
2012-11-20	6	N	E	0
2012-11-20	6	N	F	10
2012-11-20	6	C	F	1025
2012-11-20	6	D	E	383
2012-12-17	6	N	E	0
2012-12-17	6	N	E	5
2012-12-17	6	C	F	0
2012-12-17	6	C	F	16
2012-12-17	6	D	E	0
2012-12-17	6	D	E	0
2012-12-17	6	D	F	66
2013-10-27	6	C	F	0
2013-10-27	6	N	E	18
2013-10-27	6	N	F	68
2013-11-05	6	D	F	16
2013-11-05	6	D	E	15
2013-11-05	6	C	E	33
2013-11-05	6	N	E	0
2013-11-05	6	N	F	8
2013-11-05	6	C	E	99
2013-12-16	6	C	E	5
2013-12-16	6	N	F	0
2013-12-16	6	N	E	12
2013-12-16	6	C	E	0
2013-12-16	6	D	E	17
2013-12-16	6	D	F	110
2012-11-20	10	N	E	4
2012-11-20	10	N	F	0
2012-11-20	10	D	F	1207
2012-11-20	10	D	E	0
2012-12-17	10	C	E	0
2012-12-17	10	N	E	2
2012-12-17	10	N	F	2
2012-12-17	10	D	F	33
2012-12-17	10	D	E	5
2012-12-17	10	D	E	0
2012-12-17	10	D	F	2
2013-10-27	10	C	F	170
2013-10-27	10	N	E	184
2013-10-27	10	N	F	141
2013-11-05	10	D	F	73
2013-11-05	10	D	E	30
2013-11-05	10	C	E	0
2013-11-05	10	N	E	0
2013-11-05	10	N	F	341
2013-11-05	10	C	E	1014
2013-12-16	10	C	E	0
2013-12-16	10	N	F	0
2013-12-16	10	N	E	0
2013-12-16	10	C	E	6
2013-12-16	10	D	E	7
2013-12-16	10	D	F	107
